# Supplementary figures and images for: Inhibition of TOR in Chlamydomonas reinhardtii Leads to Rapid Cysteine Oxidation Reflecting Sustained Physiological Changes
Source: MDPI journal article supplement (doi:10.3390/cells8101171), 2019-09-28

a.

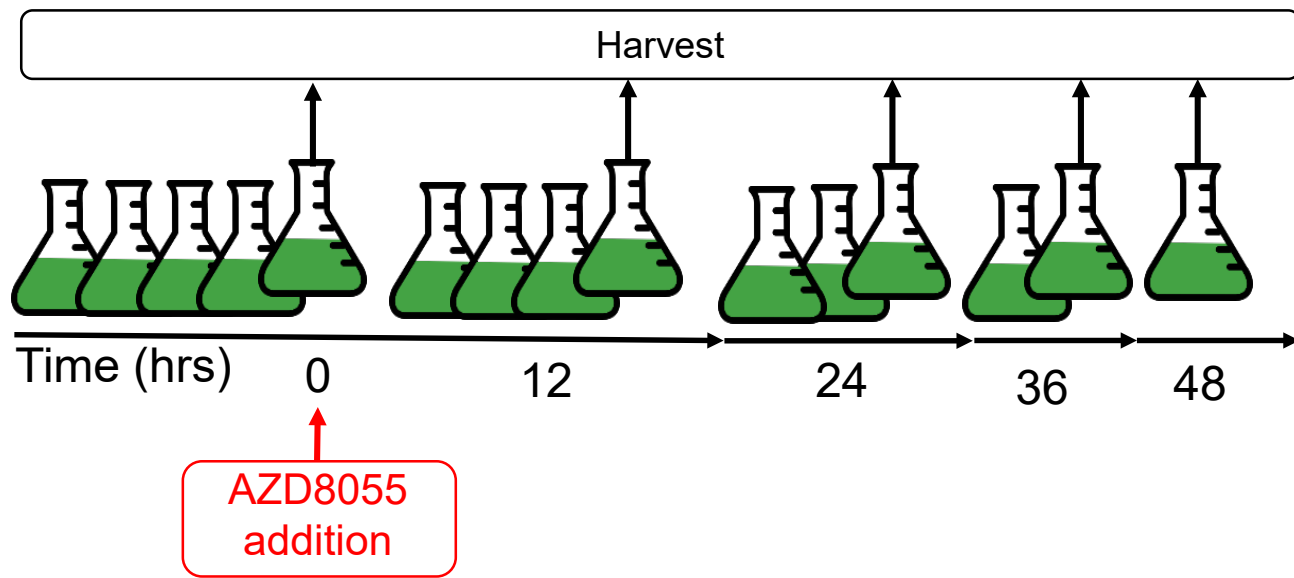

b.

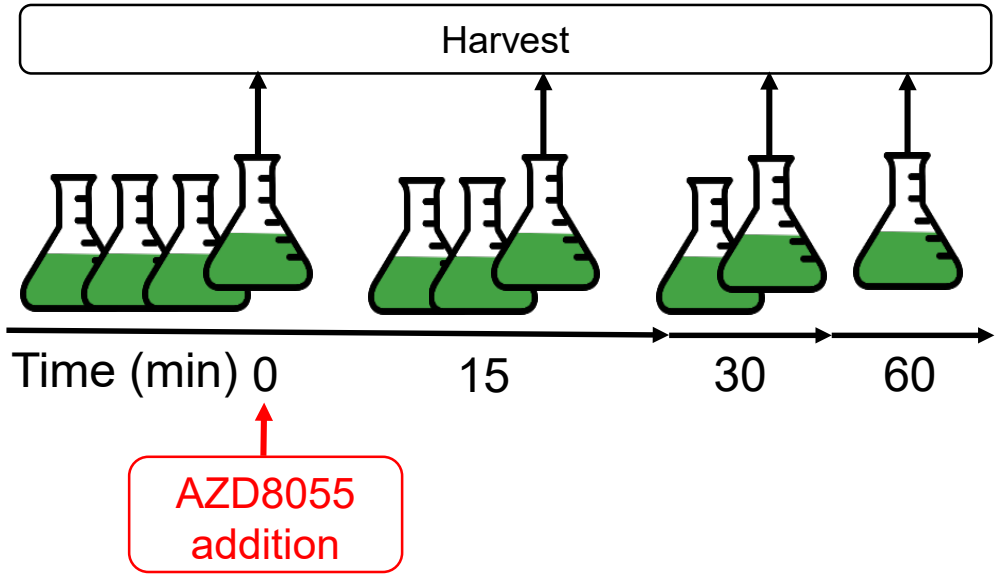

Supplement: s1 [file s1]

**B<sub>0</sub>**

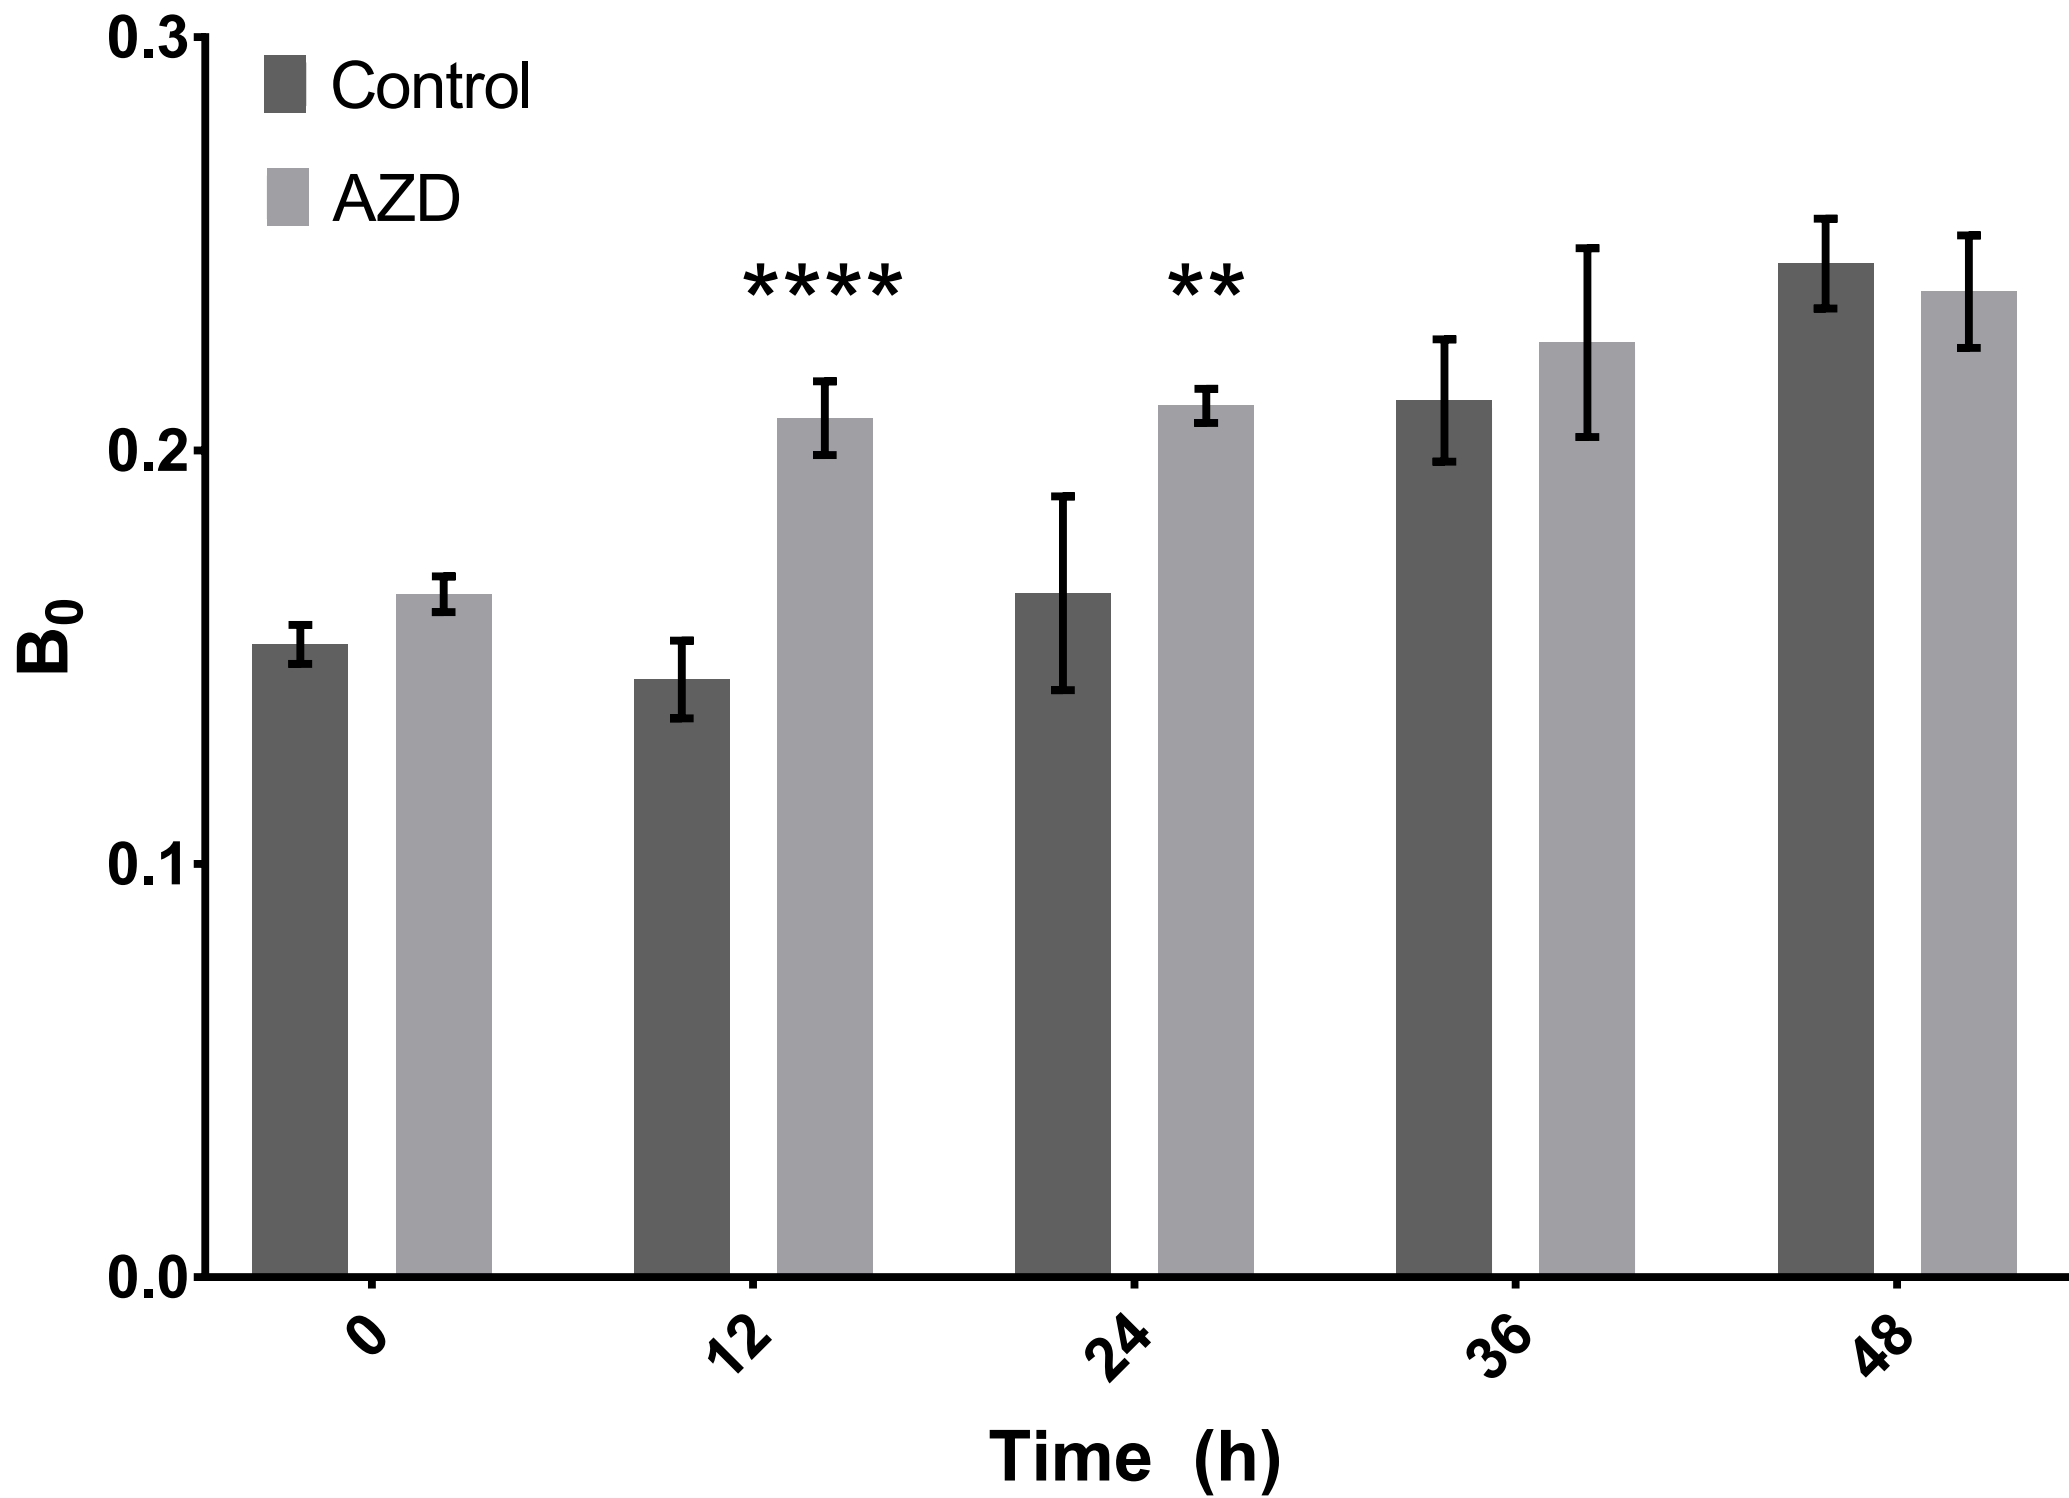

Supplement: s1 [file s1]

a.

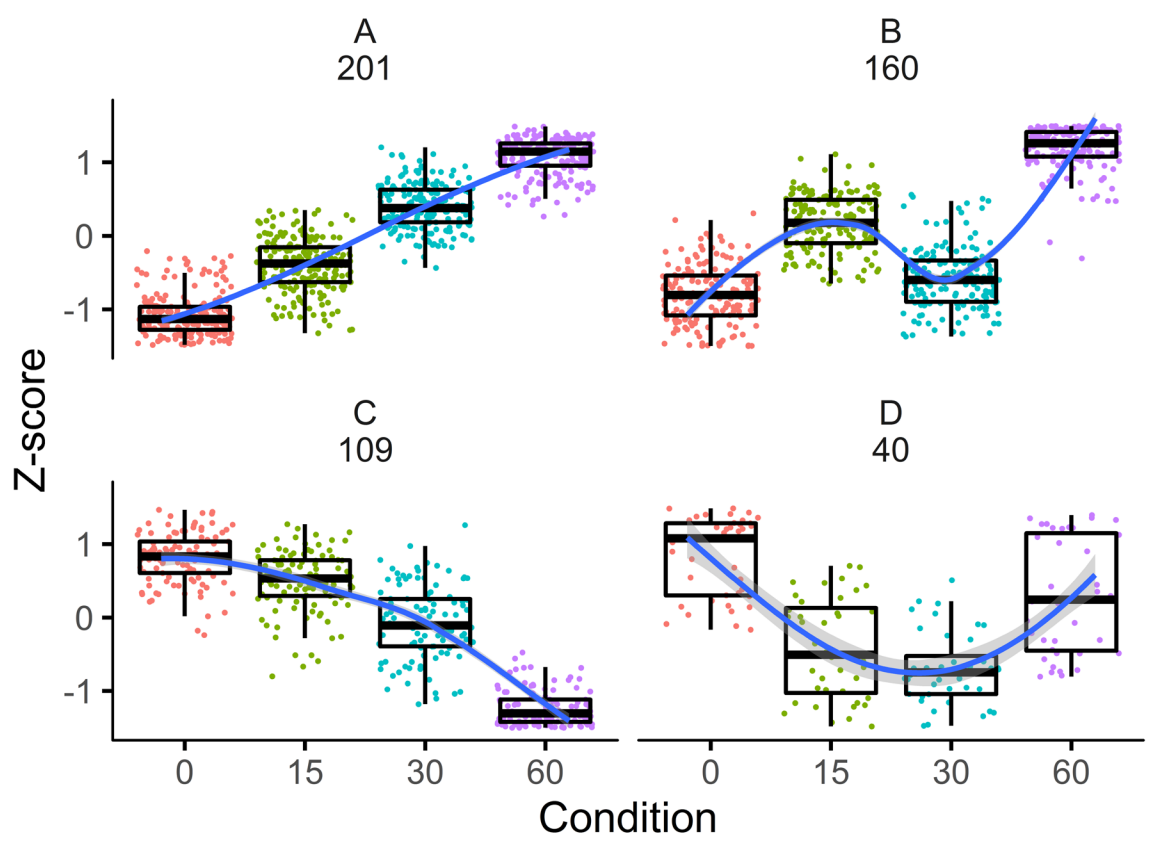

b.

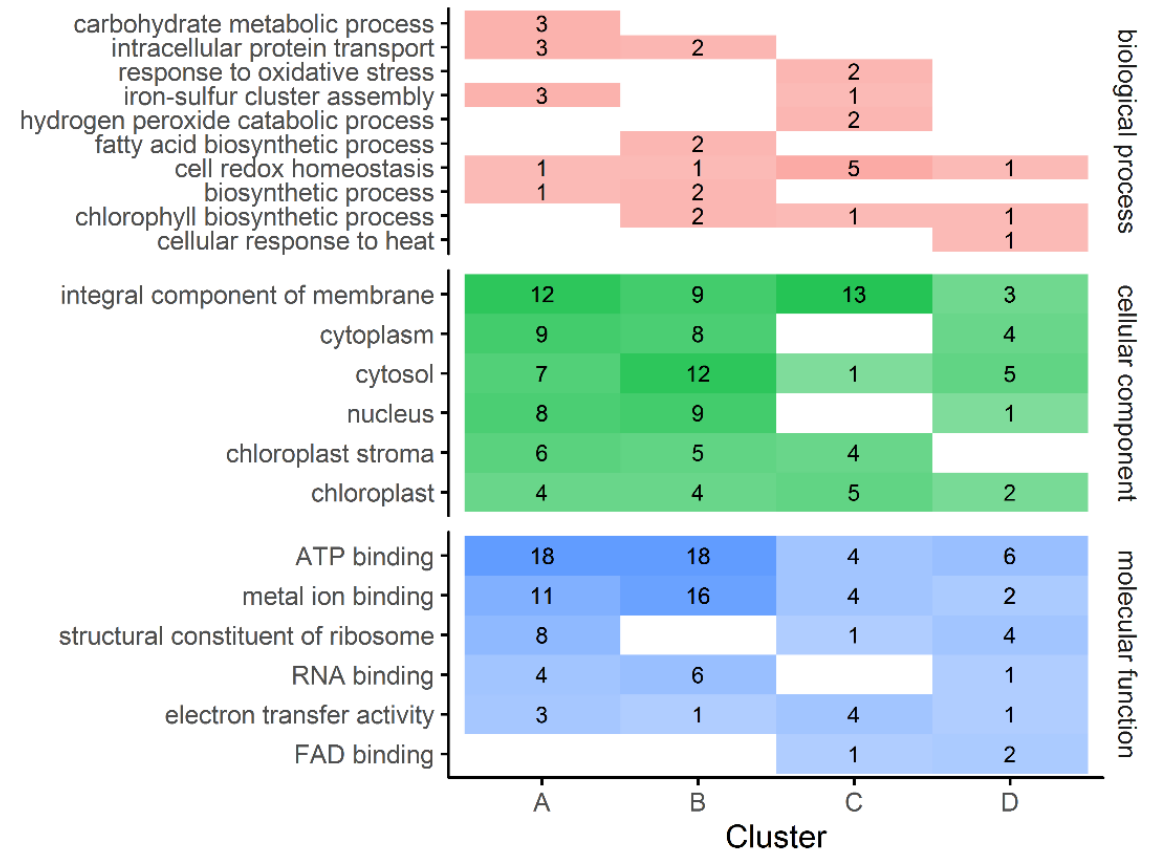

Supplement: s1 [file s1]

# Cell number

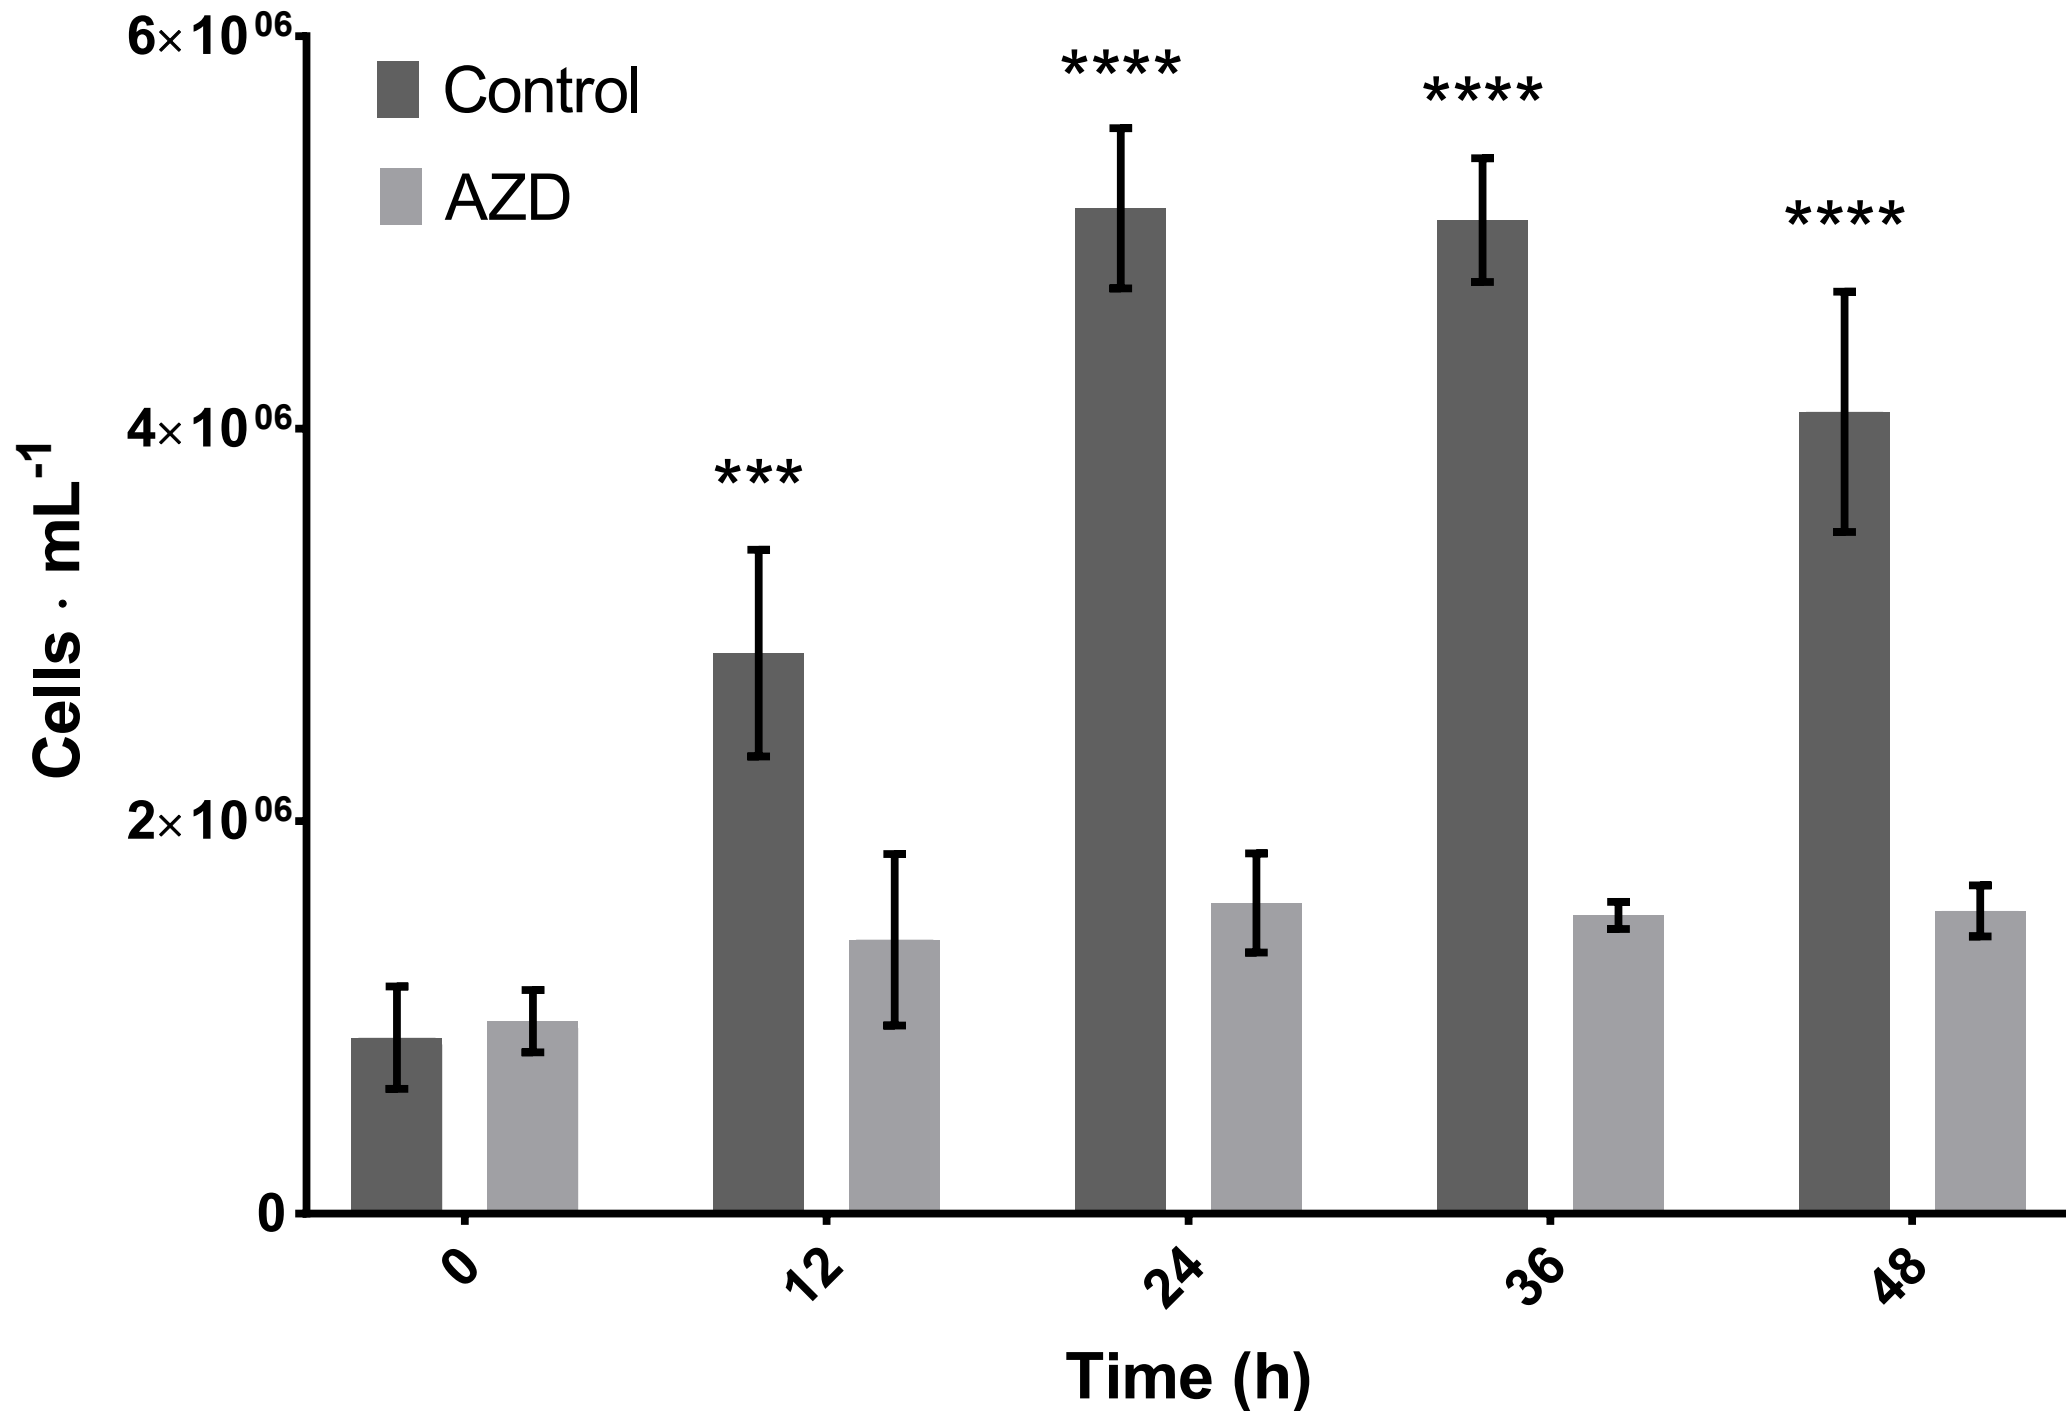

Supplement: s1 [file s1]
